# Supplementary material for: Controlled synthesis and gas sensing properties of porous Fe2O3/NiO hierarchical nanostructures
Source: Royal Society of Chemistry journal article supplement (doi:10.1039/c5ce00840a), 2015-01-01
Supplement: c5ce00840a1.pdf [file c5ce00840a1.pdf]

Supporting Information for

## Controlled synthesis and gas sensing properties of porous $\text{Fe}_2\text{O}_3/\text{NiO}$ hierarchical nanostructures

Xiaoping Shen,<sup>\*a</sup> Qiang Liu,<sup>a</sup> Zhenyuan Ji,<sup>a</sup> Guoxing Zhu,<sup>a</sup> Hu Zhou<sup>b</sup> and  
Kangmin Chen<sup>c</sup>

<sup>a</sup> School of Chemistry and Chemical Engineering, Jiangsu University, Zhenjiang  
212013, P. R. China

<sup>b</sup> School of Material Science and Engineering, Jiangsu University of Science and  
Technology, Zhenjiang 212003, P. R. China

<sup>c</sup> School of Material Science and Engineering, Jiangsu University, Zhenjiang 212013,  
P. R. China

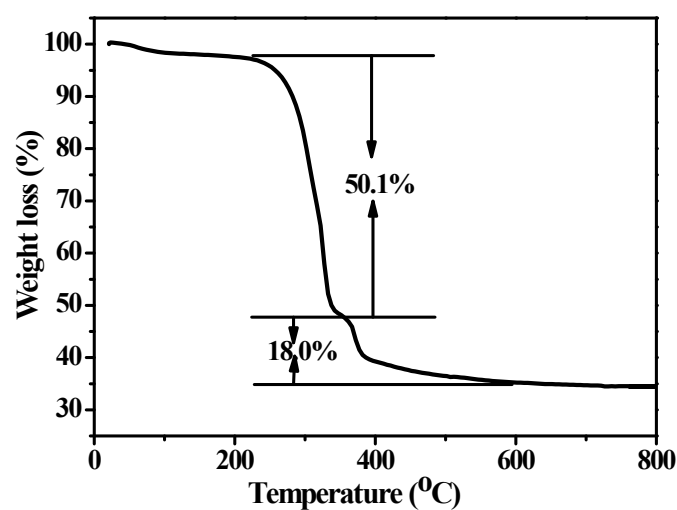

Fig. S1 TG curve of the precursor of  $\text{Fe}(\text{3-Clpy})_2[\text{Ni}(\text{CN})_4]$ .

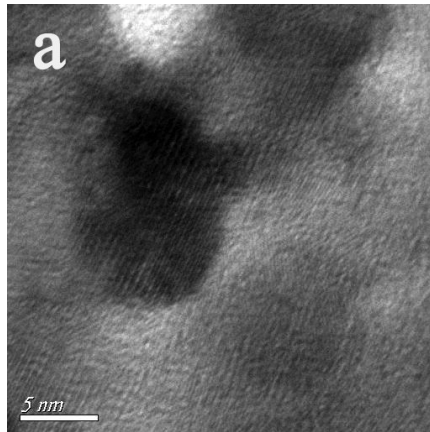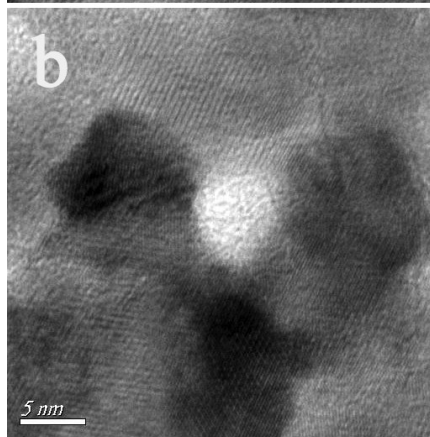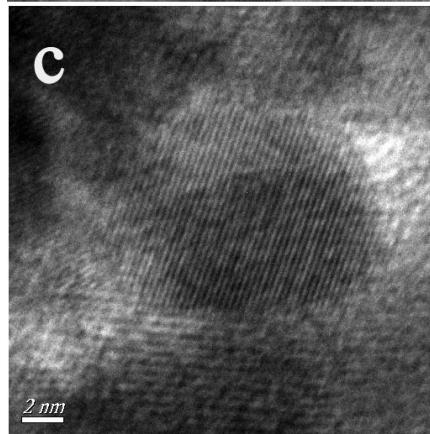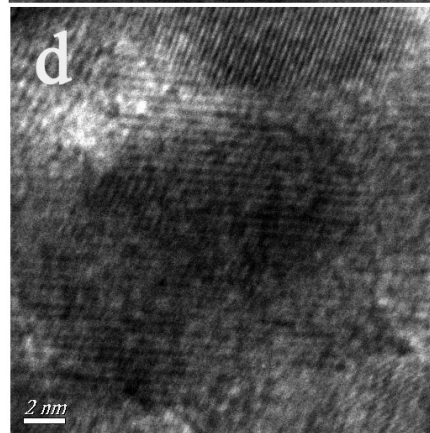

Fig. S2 HRTEM images of the cuboid-like Fe<sub>2</sub>O<sub>3</sub>/NiO nanocomposite.

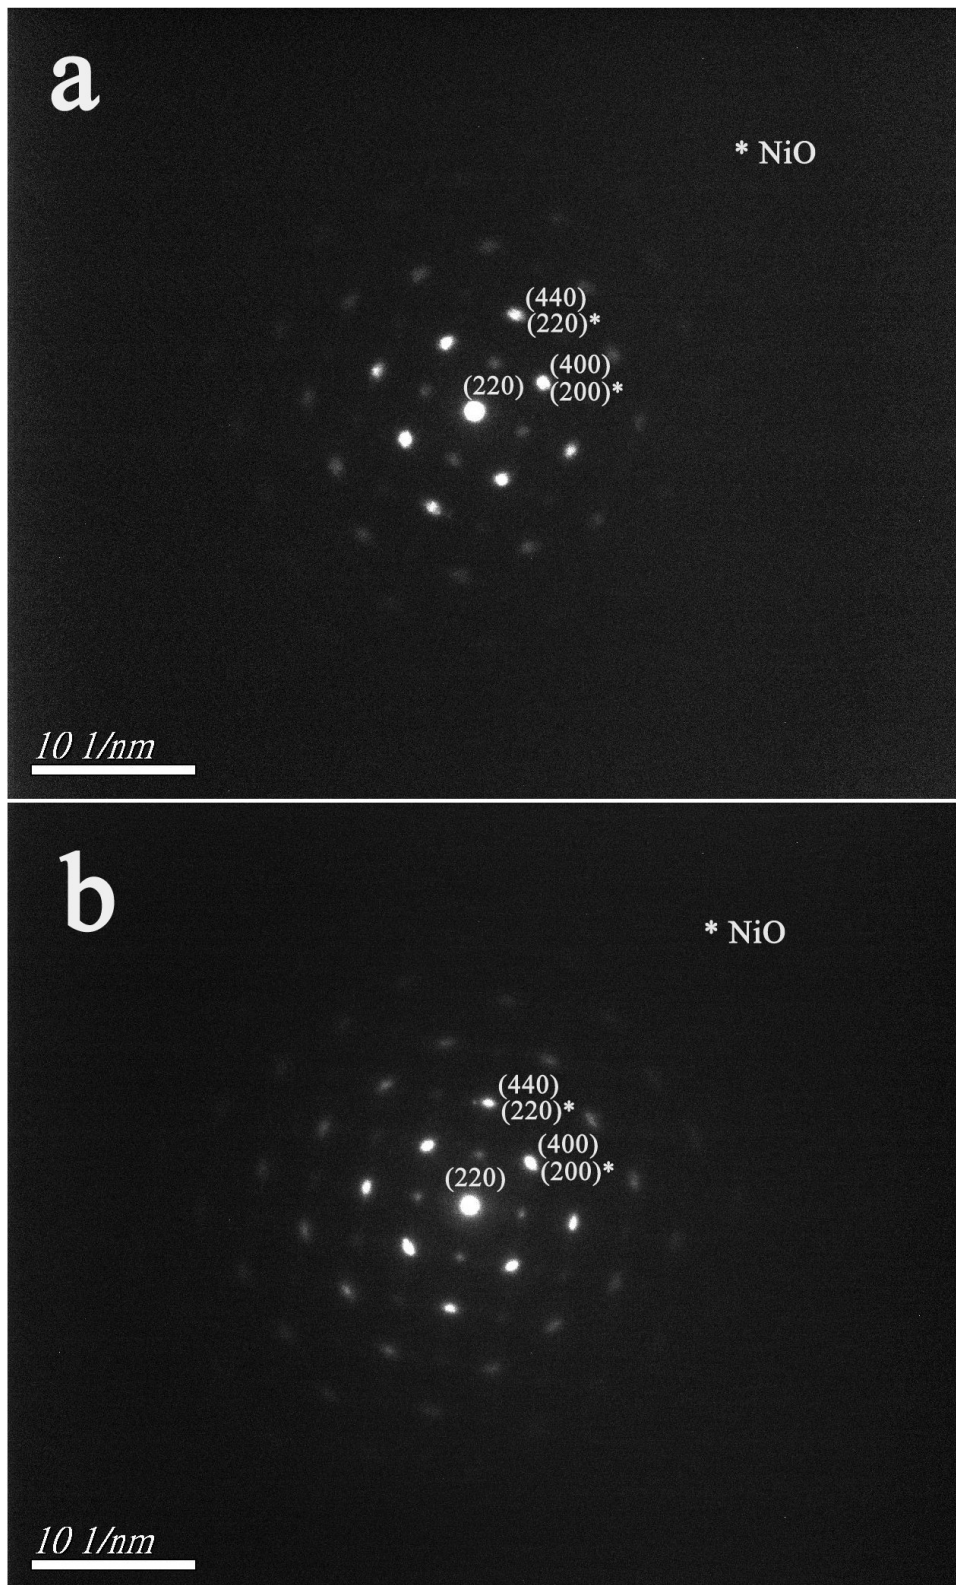

Fig. S3 SAED patterns of the cuboid-like Fe<sub>2</sub>O<sub>3</sub>/NiO nanocomposite.

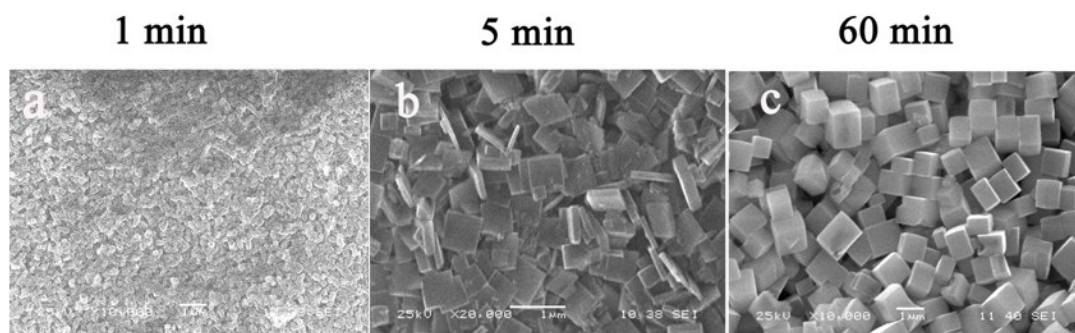

**Fig. S4** SEM images of the precursor products obtained at different reaction times.

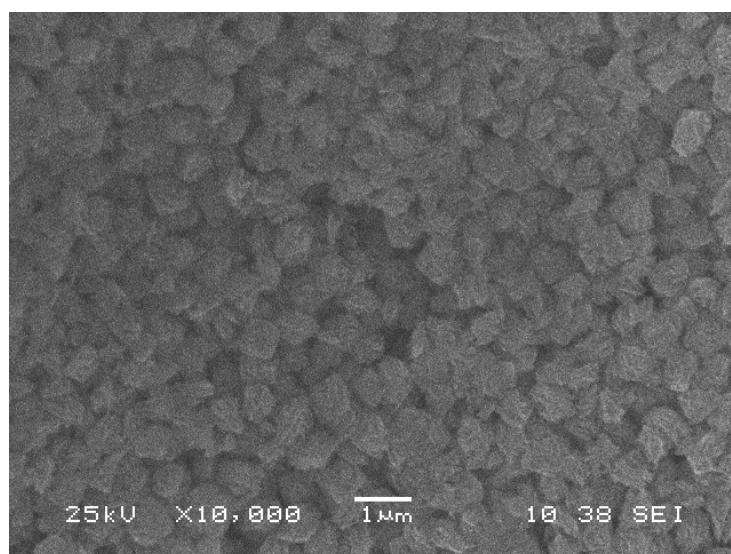

**Fig. S5** SEM image of the precursor product obtained at reaction time of 1 min in the presence of PEG.

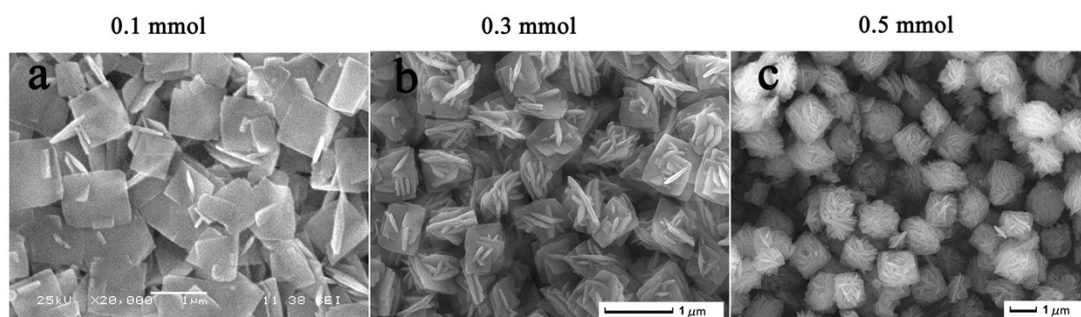

**Fig. S6** SEM images of the precursor products obtained with different amounts of  $K_2[Ni(CN)_4]$  in the presence of PEG (the molar ratios of  $K_2[Ni(CN)_4]$  /3-Clpy /  $Fe(BF_4)_2 \cdot 6H_2O$  / PEG = 1:2:1:10).

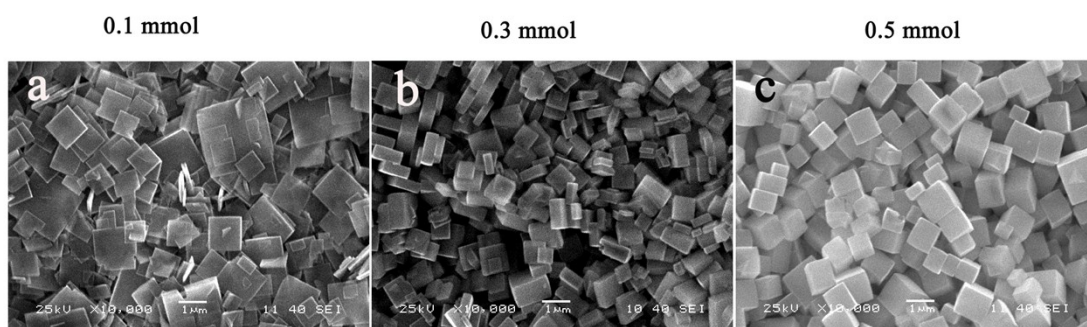

**Fig. S7** SEM images of the precursor products obtained with different amounts of  $K_2[Ni(CN)_4]$  without PEG (the molar ratios of  $K_2[Ni(CN)_4]$  / 3-Clpy /  $Fe(BF_4)_2 \cdot 6H_2O$  = 1:2:1).

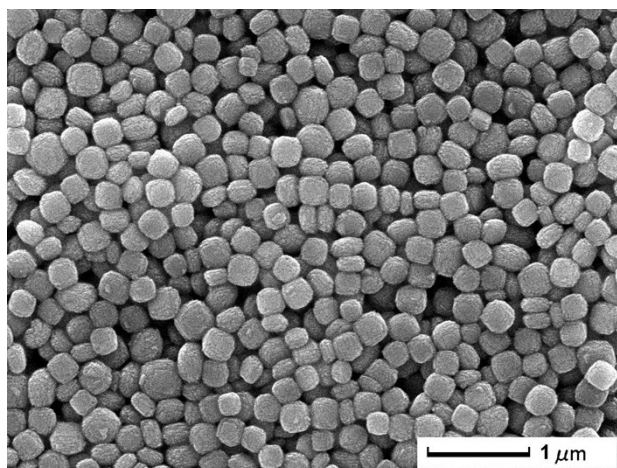

**Fig. S8** SEM image of the precursor product synthesized with the same condition as the flower-like precursor except for using PVP (5 mmol) instead of PEG as the surfactant.
